# Supplementary material for: Ammonia borane confined by nitrogen-containing carbon nanotubes: enhanced dehydrogenation properties originating from synergetic catalysis and nanoconfinement
Source: Royal Society of Chemistry journal article supplement (doi:10.1039/c5ta05540g), 2015-01-01
Supplement: c5ta05540g1.pdf [file c5ta05540g1.pdf]

## Ammonia Borane Confined by Nitrogen-containing Carbon Nanotube: Enhanced Dehydrogenation Properties Originating from the Synergetic Catalysis and Nanoconfinement

Lijun Zhang,<sup>a</sup> Guanglin Xia<sup>b</sup> Yu Ge<sup>d</sup>, Caiyun Wang<sup>d</sup>, Zaiping Guo<sup>b\*</sup>, Xingguo Li<sup>c</sup> and Xuebin Yu<sup>a\*</sup>

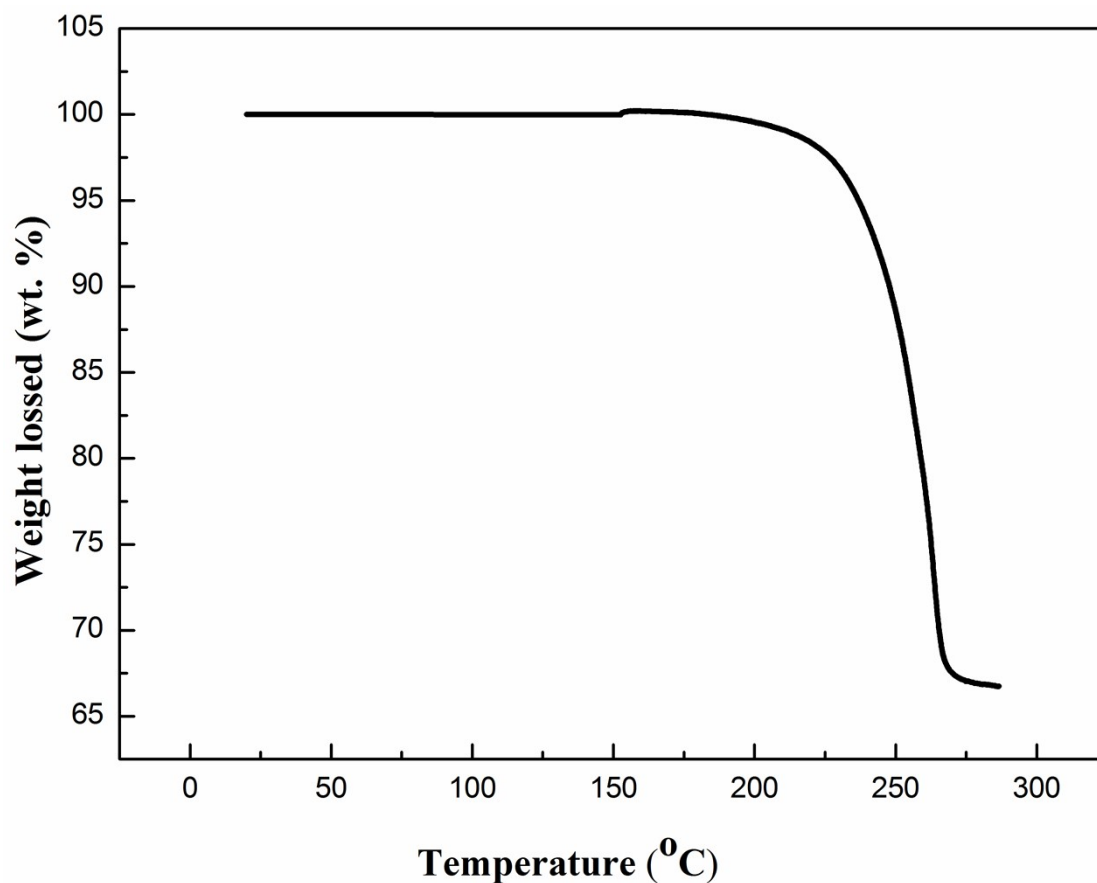

**Fig. 1** TG curve of the pure PPy with a heating rate of  $5^{\circ}\text{C}\cdot\text{min}^{-1}$  in nitrogen.

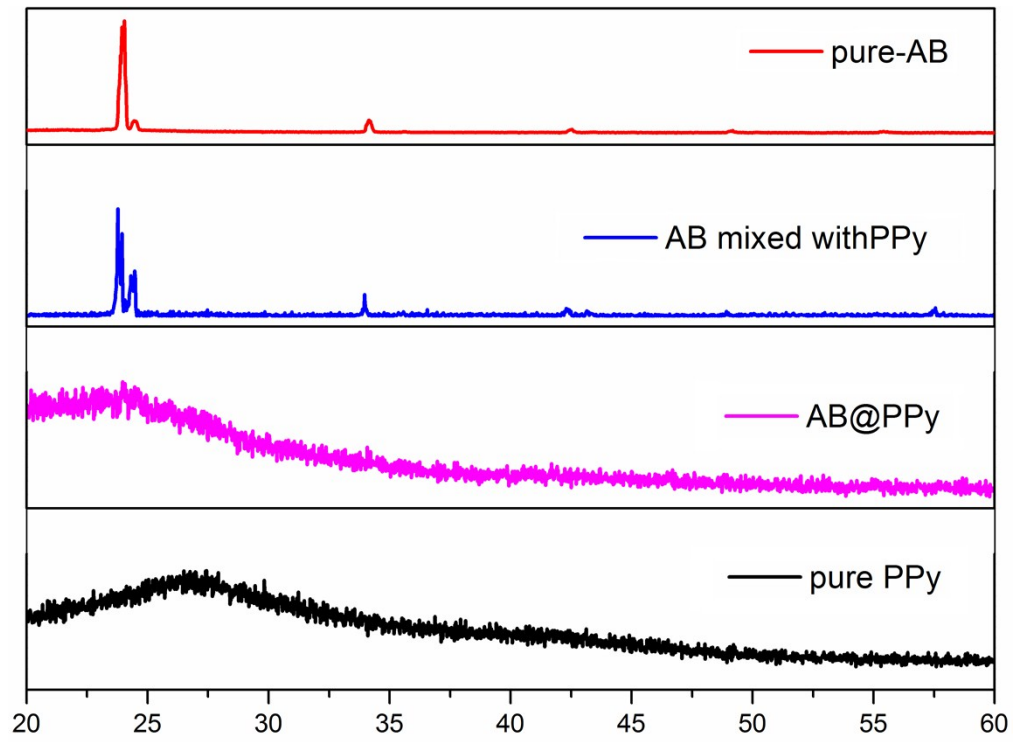

**Fig. 2** XRD spectra for pure AB, AB mixed with PPy, AB@PPy and pure PPy.

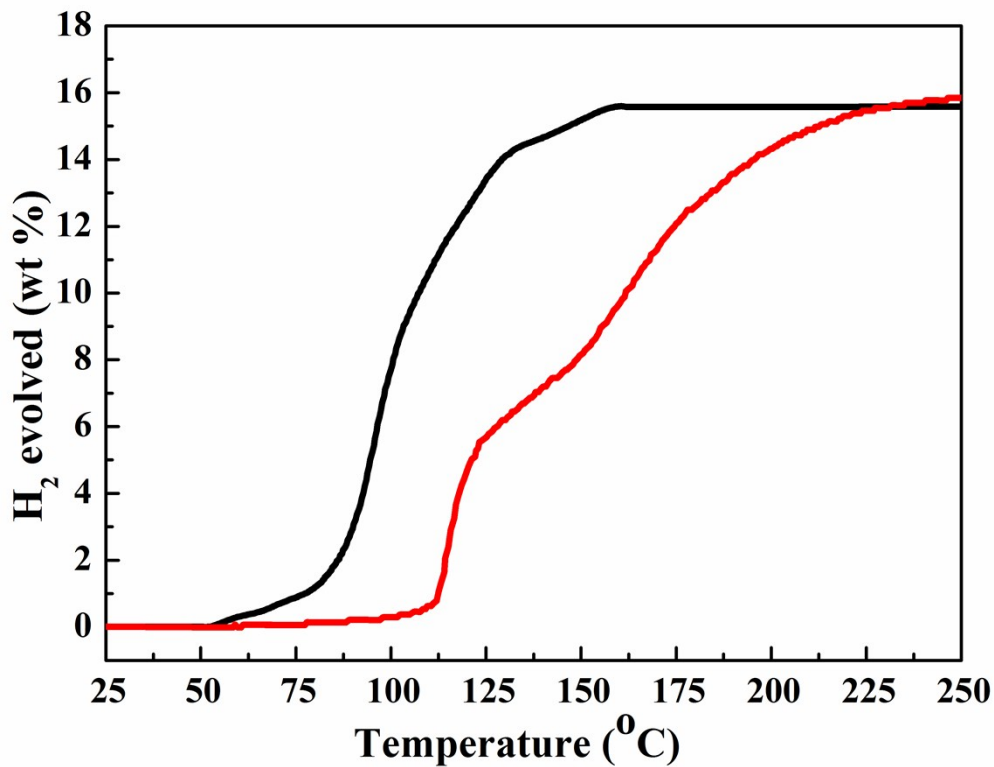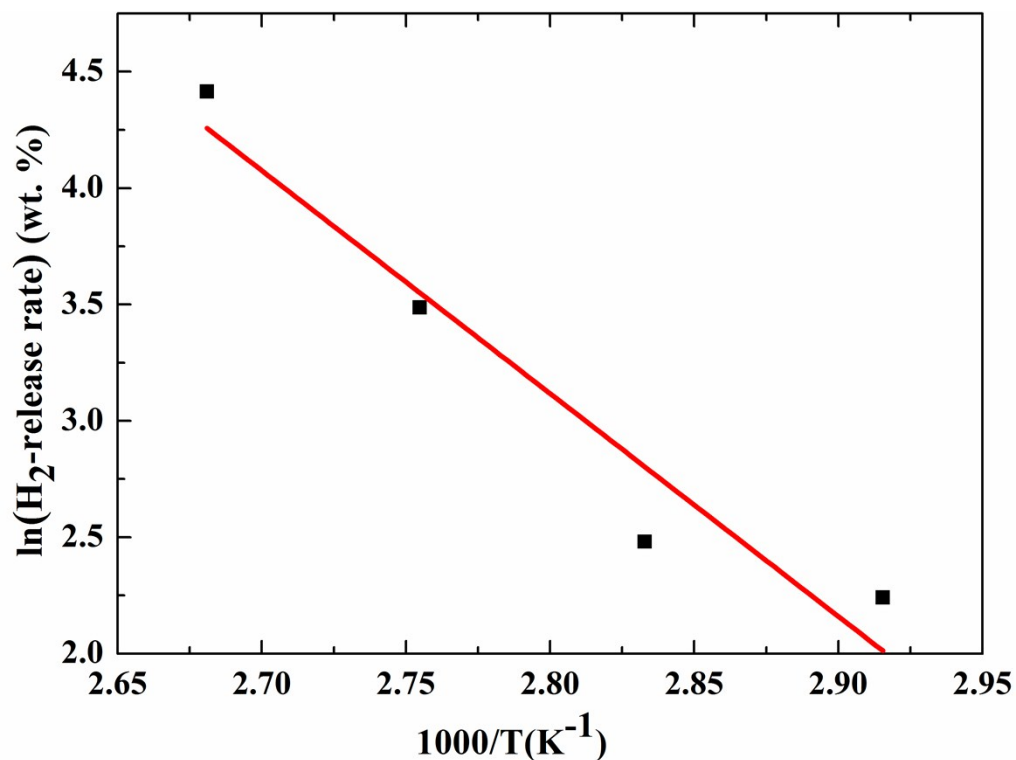

**Fig. 3** (a) TPD results for pure AB (red line) and AB@PPy (black line) with a heating rate of 5 °C·min<sup>-1</sup> in nitrogen. (b) Arrhenius profiles of the dehydrogenation kinetics of the AB@PPy. Straight lines show that data are exponential with reciprocal temperature and comply with the Arrhenius equation: rate (wt %/h) =  $k_o \exp(-E_a / RT)$ .
